# Supplementary material for: A facile surface modification of a PVDF membrane via CaCO3 mineralization for efficient oil/water emulsion separation
Source: Royal Society of Chemistry journal article supplement (doi:10.1039/d0nj03329d), 2020-01-01
Supplement: d0nj03329d1.pdf [file d0nj03329d1.pdf]

## **Electronic Supplementary Information (New Journal of Chemistry)**

### **Facile surface modification of PVDF membrane via CaCO<sub>3</sub> mineralization for efficient oil/water emulsion separation**

Junda Wu<sup>a</sup>, Atian Xie<sup>b</sup>, Jin Yang<sup>a</sup>, Jiangdong Dai<sup>a</sup>, Chunxiang Li<sup>a</sup>, Yongsheng Yan<sup>a\*</sup>,  
Jiuyun Cui<sup>b\*</sup>

<sup>a</sup>Institute of Green Chemistry and Chemical Technology, School of Chemistry and  
Chemical Engineering, Jiangsu University, Zhenjiang 212013, China

<sup>b</sup>School of Materials Science and Engineering, Anhui University of Science and  
Technology, Huainan, Anhui, 232001, China

\*Corresponding Author

E-mail: yys@mail.ujc.edu.cn, cjy@aust.edu.cn

Tel: +86 0511-88790683; Fax: +86 0511-88791800

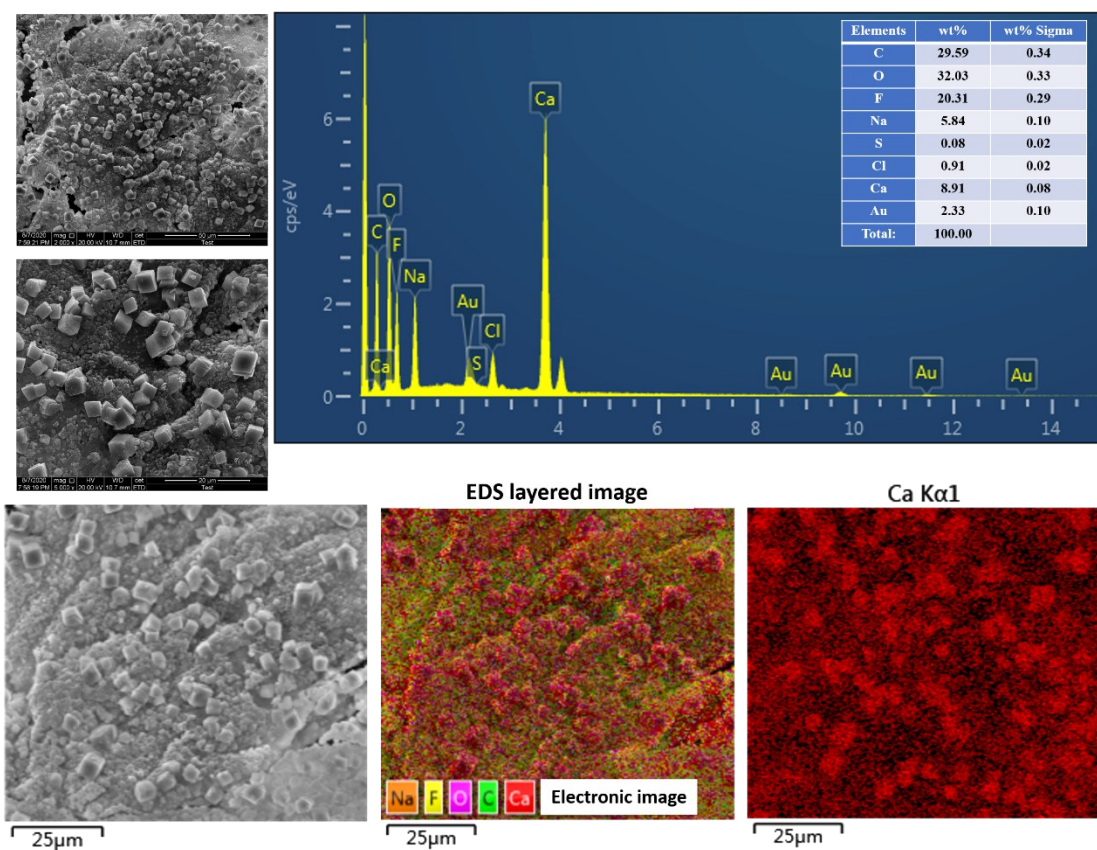

Fig. S1. SEM and EDS mapping of the PVDF@pDA@CaCO<sub>3</sub>-2 composite membrane

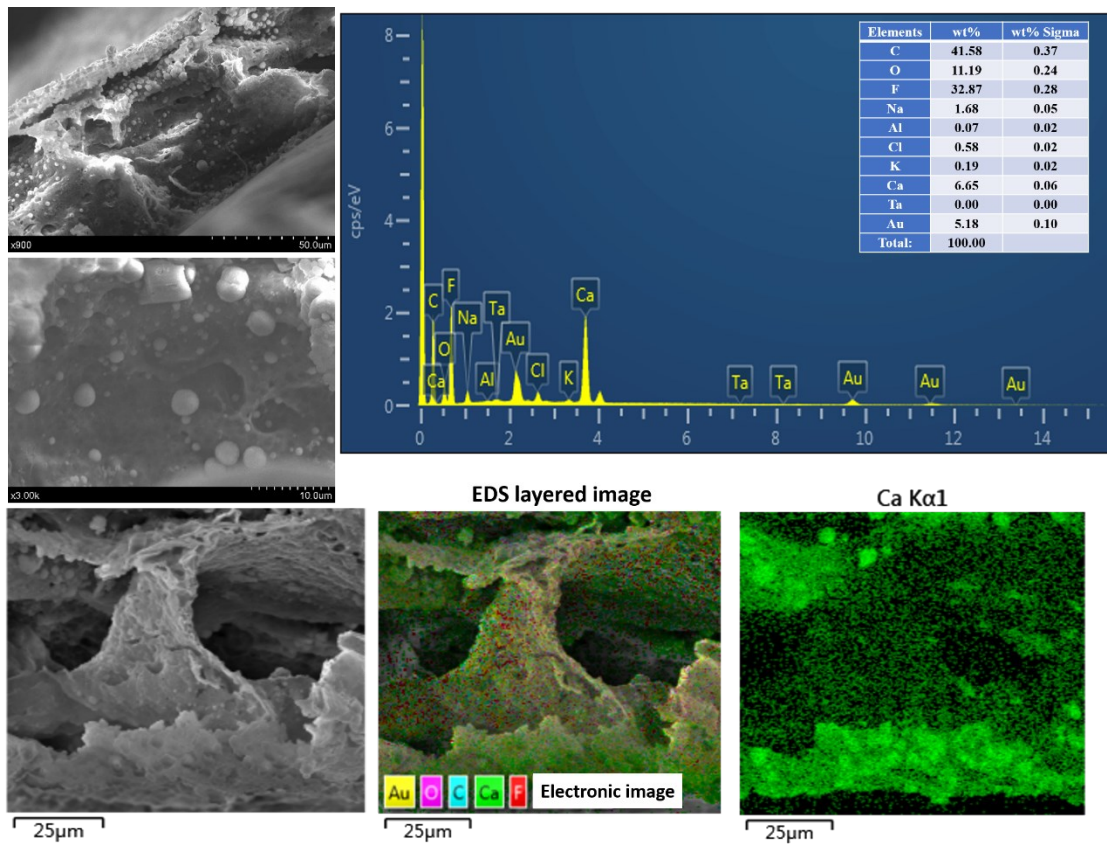

Fig. S2. The cross-section SEM and EDS mapping of the PVDF@pDA@CaCO<sub>3</sub>-2 composite membrane

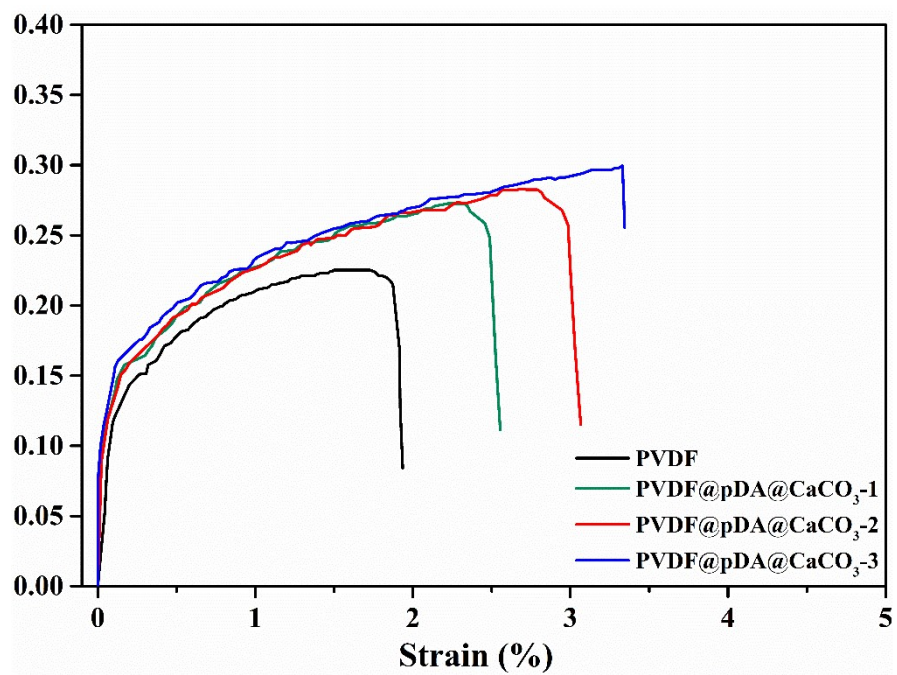

Fig. S3. The stress-strain curves of the membranes

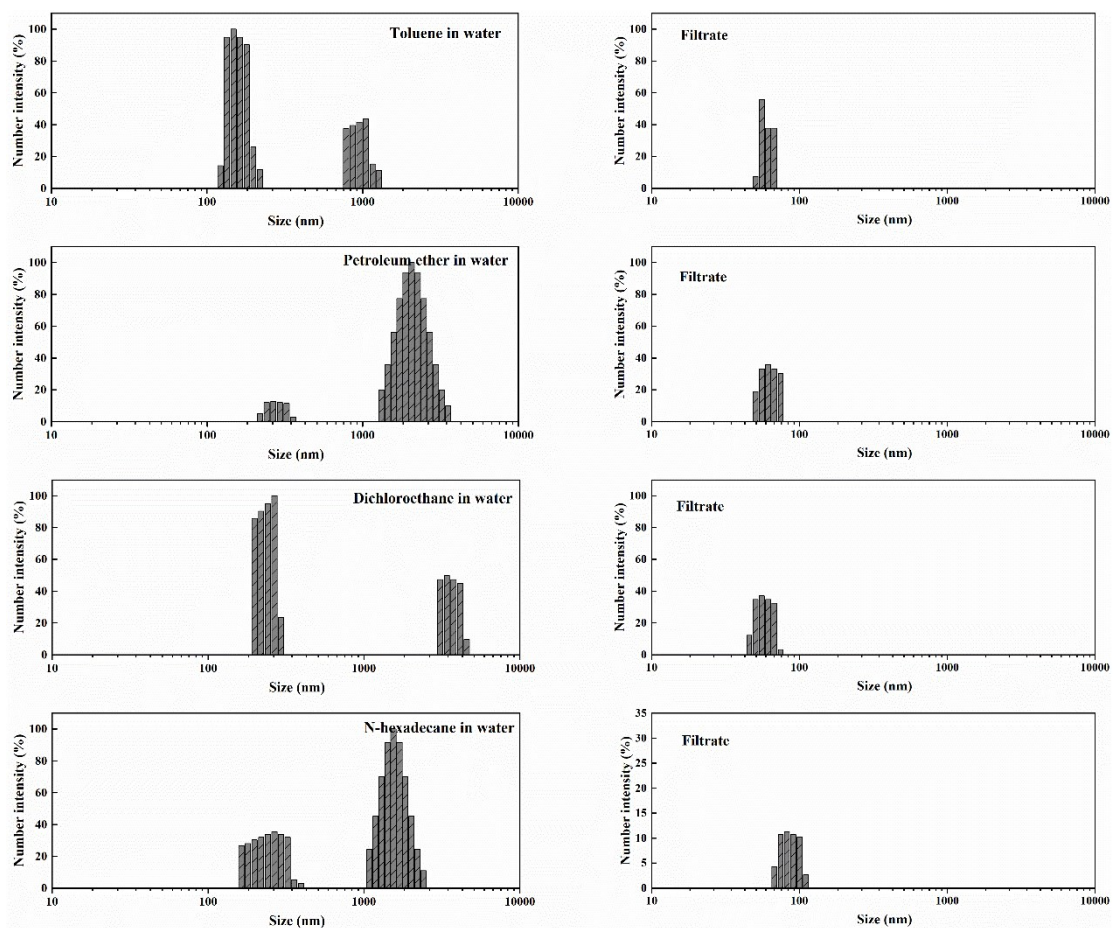

Fig. S4. The particle size distribution of various emulsions before/after the separation by PVDF@pDA@CaCO<sub>3</sub>-2 membrane

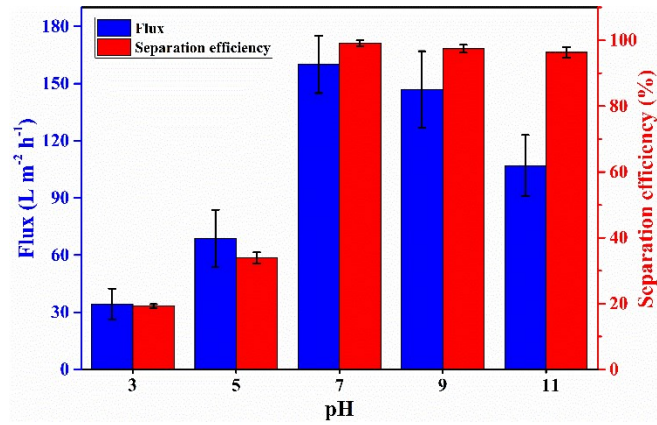

Fig. S5. Permeation flux and separation efficiency of PVDF@pDA@CaCO<sub>3</sub>-2 composite membrane for petroleum ether/water emulsions with various pH
